# Supplementary material for: Early nasogastric tube feeding in optimising treatment for hyperemesis gravidarum: the MOTHER randomised controlled trial (Maternal and Offspring outcomes after Treatment of HyperEmesis by Refeeding)
Source: Springer Nature journal article supplement (doi:10.1186/s12884-016-0815-1), 2016-01-27
Supplement: MOESM1 [file 9743722]

Case Number |\_|\_|\_| - |\_|\_|\_|

## Case Report Form

CONFIDENTIAL

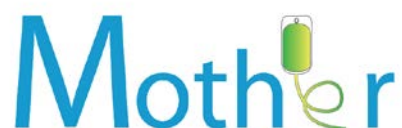

*Maternal and Offspring outcomes after Treatment of HyperEmesis  
by Refeeding*

*Principal investigator:*  
Prof. dr. T.J. Roseboom

*Coordinating researcher:*  
I J Grooten, MD PhD student

### **Contact**

I J Grooten, MD PhD student  
Tel: 020-5668483 / 06-22971381  
Email: [mother@studies-obsgyn.nl](mailto:mother@studies-obsgyn.nl)  
Website: [www.studies-obsgyn.nl/mother](http://www.studies-obsgyn.nl/mother)

**Please read CRF instructions carefully!**

Verwijderd: 1

Verwijderd: 17

Verwijderd: 04

**TABLE OF CONTENTS**

|                                                                             |    |
|-----------------------------------------------------------------------------|----|
| TABLE OF CONTENTS                                                           | 2  |
| CRF INSTRUCTIONS                                                            | 3  |
| 1. General information                                                      | 4  |
| 2. Randomization                                                            | 4  |
| 3. Medical history                                                          | 5  |
| 4. Obstetric history                                                        | 5  |
| 5. Current pregnancy                                                        | 6  |
| 5.1 Baseline characteristics                                                | 6  |
| 5.2 Urinary ketones at admission (during which patient was randomized)      | 7  |
| 5.3 Blood test at admission (during which patient was randomized)           | 7  |
| 5.4 Medication during first admission (during which patient was randomized) | 8  |
| 6. Intervention (started during admission in which patient was randomized)  | 9  |
| 6.1 Intravenous (i.v.) drip                                                 | 9  |
| 6.2 Tube feeding                                                            | 11 |
| 7. Level of care                                                            | 13 |
| 7.1 Routine pregnancy check-ups                                             | 14 |
| 7.2 Hospital readmissions for HG                                            | 14 |
| 8. Delivery                                                                 | 16 |
| 9. Neonatal birth data                                                      | 18 |
| 10. Hospital admission postpartum                                           | 19 |
| 10.1 Maternal hospital admission                                            | 19 |
| 10.2 Neonatal hospital admission                                            | 20 |
| 11. (Serious) Adverse Events                                                | 21 |
| 12. End Study Form                                                          | 22 |
| 12.1 Study stop                                                             | 22 |
| 13. Supplement for patients included before 01-09-2014                      | 23 |
| 13.1 Maternal background                                                    | 23 |
| 13.2 Current pregnancy                                                      | 24 |

Verwijderd: 1

Verwijderd: 17

Verwijderd: 04

Case Number |\_|\_|\_| - |\_|\_|\_|

## CRF INSTRUCTIONS

1. Fill out CRF using a blue or black pen
2. Write clearly, if possible using capitals
3. Answer all questions. Only use 'unknown' when this option is given
4. selection of buttons should be:  or  or  (if applicable)
5. Radio buttons 'O' are used when only one answer is possible
6. Check boxes '' are used when multiple answers are possible
7. Open Combs, e.g. '|\_|' are used for numerical answers
8. For missing numeric values, write '-1'. Otherwise, select 'unknown'
9. Write dates as follows: dd-mm-jj e.g. 01-01-2001
10. When a date is (partly) missing, use '99' for missing part, e.g. when the day is missing: 99-01-2001. When day and month are missing: 99-99-2001. When complete date is missing: 99-99-99
11. Never hide corrections (using Tipp-Ex)
12. When you want to correct something, strike through false answer with a single line, followed by the right answer. Sign and date this correction
13. After CRF completion, the local PI has to sign the CRF to declare complete and truthful filling out. After signing, corrections can no longer be made to the CRF

Verwijderd: 1

Verwijderd: 17

Verwijderd: 04

Case Number |\_|\_|\_| - |\_|\_|\_|

## 1. General information

Case number |\_|\_|\_| - |\_|\_|\_| (*clinic - case*)

Date of birth |\_|\_| - |\_|\_| - |\_|\_| (*dd-mm-yy*)

Patient initials |\_|\_| (*initials first name and female family name*)

## 2. Randomization

Date of randomization |\_|\_| - |\_|\_| - |\_|\_| (*dd-mm-yy*)

### Treatment allocation

Tube feeding + standard care

Standard care

### Randomized on day of hospital admission for hyperemesis gravidarum (HG)\*

no  yes  unknown

|

Date of hospital admission for HG |\_|\_| - |\_|\_| - |\_|\_| (*dd-mm-yy*)

Date of hospital discharge for HG |\_|\_| - |\_|\_| - |\_|\_| (*dd-mm-yy*)

### Current admission is first admission for HG

no  yes  unknown

|

Number of previous admissions for HG |\_|\_| (*0-10*)

\*Hyperemesis gravidarum will further be abbreviated as HG

Verwijderd: 1

Verwijderd: 17

Verwijderd: 04

Case Number |\_|\_|\_| - |\_|\_|\_|

### 3. Medical history

#### Disease(s)\*

|                                        |                          |                           |
|----------------------------------------|--------------------------|---------------------------|
| Hypothyroidism                         | <input type="radio"/> no | <input type="radio"/> yes |
| Hyperthyroidism                        | <input type="radio"/> no | <input type="radio"/> yes |
| Pre-existing diabetes (type I/type II) | <input type="radio"/> no | <input type="radio"/> yes |
| Pre-existing hypertension              | <input type="radio"/> no | <input type="radio"/> yes |
| Peptic ulcer                           | <input type="radio"/> no | <input type="radio"/> yes |
| Depressive disorder <sup>†</sup>       | <input type="radio"/> no | <input type="radio"/> yes |
| Anxiety disorder <sup>§</sup>          | <input type="radio"/> no | <input type="radio"/> yes |
| Eating disorder                        | <input type="radio"/> no | <input type="radio"/> yes |
| Other; _____                           |                          |                           |

\*History of disease or ongoing disease

<sup>†</sup>Including postnatal depression

<sup>§</sup>Including posttraumatic stress disorder (PTSS)

### 4. Obstetric history

Gravidity |\_|\_| (0-15)

Parity |\_|\_| (0-10)

Miscarriage |\_|\_| (0-10)

EUG |\_|\_| (0-10)

Termination of pregnancy (APLA) |\_|\_| (0-10)

Progeniture (children alive) |\_|\_| (0-10)

#### Previous pregnancy

no  yes

|

#### HG in a previous pregnancy

no  yes  unknown

|

#### Requiring hospital admission

no  yes  unknown

Verwijderd: 1

Verwijderd: 17

Verwijderd: 04

Case Number |\_|\_|\_| - |\_|\_|\_|

## 5. Current pregnancy

### 5.1 Baseline characteristics

**Estimated date of delivery\*** |\_|\_| - |\_|\_| - |\_|\_| (dd-mm-yy)  
*\*Based on ultrasound or embryo transfer*

#### Type of pregnancy

- Singleton  
 Twins / Higher order multiple

**Height\*** |\_|\_|\_| cm (140-210)  
*\*unknown: -1*

#### Smoking

- No/Quit before pregnancy     Yes     Unknown

#### Drug use

No/Quit before pregnancy     Yes     Unknown

- ↓  
 Cannabis  
 Other

#### Folic acid use

- No     Yes     Unknown

#### Antiemetics started before admission (medicatie tegen misselijkheid)

- No     Yes     Unknown

Verwijderd: 1

Verwijderd: 17

Verwijderd: 04

Case Number |\_|\_|\_| - |\_|\_|\_|

### 5.2 Urinary ketones at admission (during which patient was randomized)

Date first measurement of urinary ketones during admission process\*\*†

|\_|\_| - |\_|\_| - |\_|\_| (dd-mm-yy)

\* Unknown: 99-99-99

† May or may not be the same as admission date

Fill out corresponding value for urinary ketones

- Negative       Positive       Unknown
- |
- +
- ++
- +++
- ++++
- Unknown

### 5.3 Blood testing at admission (during which patient was randomized)

Date first blood test during admission process\*\*†

|\_|\_| - |\_|\_| - |\_|\_| (dd-mm-yy)

\* Unknown: 99-99-99

† May or may not be the same as admission date

Fill out corresponding blood values for\*

|           |            |        |
|-----------|------------|--------|
| Hb        | _ _ .  _ _ | mmol/l |
| Ht        | _ .  _ _   | l/l    |
| TSH       | _ .  _ _   | mU/l   |
| Na        | _ _ _      | mmol/l |
| K         | _ .  _     | mmol/l |
| ASAT      | _ _ _      | U/l    |
| ALAT      | _ _ _      | U/l    |
| Urea      | _ .  _     | mmol/l |
| Creatinin | _ _ _      | mmol/l |

\*Unknown: -1

Have magnesium (Mg) and phosphate (P) been measured during admission

No       Yes       Unknown

|

Date of first measurement\*\*† |\_|\_| - |\_|\_| - |\_|\_| (dd-mm-yy)

\* Unknown: 99-99-99

† May or may not be the same as first blood test date. In some hospitals, Mg and P are only tested in patients receiving tube feeding

Fill out corresponding blood values for\*

|                    |        |        |
|--------------------|--------|--------|
| Mg (magnesium)     | _ .  _ | mmol/l |
| P (fosfaat/fosfor) | _ .  _ | mmol/l |

\*Unknown: -1

Verwijderd: 1

Verwijderd: 17

Verwijderd: 04

Case Number |\_|\_|\_| - |\_|\_|\_|

#### 5.4 Medication during first admission (during which patient was randomized)

##### Antiemetics (*medicatie tegen misselijkheid*)

- No       Yes       Unknown
- |
- Emesafene p.o. / supp
  - Primperan p.o. / supp
  - Primperan i.v.
  - Ondansetron (Zofran) p.o. / supp
  - Ondansetron (Zofran) i.v.
  - Steroids\*
  - Other

\*Prescribed as antiemetic, not because of fetal lung ripening

##### Vitamins

- No       Yes       Unknown
- |
- B1 (*thiamin*)
  - B6 (*pyridoxin*)
  - B12 (*cobalamin*)
  - B complex
  - Other

Verwijderd: 1

Verwijderd: 17

Verwijderd: 04



Case Number |\_|\_|\_| - |\_|\_|\_|

6. Intervention (started during admission in which patient was randomized)

6.1 Intravenous (i.v.) drip

**Note: For exact intravenous rehydration regimen, check both medical and nursing record to help you fill out this section**

**Did patient receive an i.v. drip\***

No  Yes  Unknown

- |
- Patient declined
- Doctor advised against
- Other; \_\_\_\_\_

\*As standard treatment or in combination with tube feeding

**If i.v. drip:**

**Was i.v. drip placed on day of randomization**

No  Yes  Unknown

|

**Date of i.v. drip placement\***    |\_|\_| - |\_|\_| - |\_|\_| (dd-mm-yy)  
\*Unknown: 99-99-99

**i.v. drip solution contained\***

- NaCl
- Glucose
- KCl
- Other; \_\_\_\_\_

\*If in medical or nursing record only: 'i.v. drip according to protocol', fill out what is prescribed according to local protocol for HG

**Did patient experience any side effect(s) of i.v. drip**

No  Yes\*  Unknown

- |
- Phlebitis (pain/redness/swelling at insertion area)
- Allergic reaction
- Other; \_\_\_\_\_

\* See paragraph 8.3 whether SAE form needs to be filled out

Verwijderd: 1

Verwijderd: 17

Verwijderd: 04

Case Number |\_\_|\_\_|\_\_| - |\_\_|\_\_|\_\_|

**Was i.v. drip removed because of side effects**

- No       Yes       Unknown  
|  
 Patients request  
 Doctors' advice  
 Other; \_\_\_\_\_

**Date of i.v. drip removal\*\*†** |\_\_|\_\_| - |\_\_|\_\_| - |\_\_|\_\_| (dd-mm-yy)

\*Unknown: 99-99-99

†All reasons for i.v. drip removal

**If i.v. drip was removed, was it replaced**

- No       Yes       Unknown

|  
**Date of i.v. drip replacement\*\*†** |\_\_|\_\_| - |\_\_|\_\_| - |\_\_|\_\_|

(dd-mm-yy)

\*Unknown: 99-99-99

†Replacement during this admission, not placement of i.v. drip during readmission. In some hospitals patients receive a venflon and return the next day again for rehydration. This is not considered i.v. drip replacement but continuation of care until venflon is removed

**Date of replaced i.v. drip removal\*\*†** |\_\_|\_\_| - |\_\_|\_\_| - |\_\_|\_\_|

(dd-mm-yy)

\*Unknown: 99-99-99

†All reasons for i.v. drip removal

Verwijderd: 1

Verwijderd: 17

Verwijderd: 04

## 6.2 Tube feeding

**Note: The dietician in your hospital will fill out a weekly registration form for all patients in this trial that have received tube feeding. When you fill out a CRF, please collect these form(s) for the specific patient, to help you fill out this section. These forms also contain complementing information on tube feeding regimen and caloric intake (not asked in this CRF)**

Please attach the dietician registration form(s) to this CRF

If randomized for standard care: Did patient receive a tube

- No       Yes       Unknown  
|  
 Patients request  
 Doctors' /dieticians' advice  
 Other; \_\_\_\_\_

If randomized for tube feeding + standard care: Did patient receive a tube

- No       Yes       Unknown  
|  
 Patient refused tube placement  
 Tube not in stock  
 Other; \_\_\_\_\_

If tube:

Was tube placed on day of randomization

- No       Yes       Unknown  
|

Date of tube placement\* |\_\_|\_\_| - |\_\_|\_\_| - |\_\_|\_\_| (dd-mm-yy)

\*Unknown: 99-99-99

Did patient experience any side effect(s) of tube

- No       Yes\*       Unknown  
|  
 Nose/throat irritation  
 Continuation of vomiting  
 Tube obstruction  
 Tube dislocation  
 Aspiration  
 Intestinal bleeding  
 Intestinal perforation  
 Other; \_\_\_\_\_

\* See paragraph 8.3 whether SAE form needs to be filled out

Verwijderd: 1

Verwijderd: 17

Verwijderd: 04

Case Number |\_\_|\_\_|\_\_| - |\_\_|\_\_|\_\_|

If tube was dislocated, how often did this occur\* |\_\_|\_\_| times (0-10)

\* Unknown: -1

**Was tube removed because of side effects**

- No       Yes       Unknown  
|  
 Patients request  
 Doctors' advice  
 Other; \_\_\_\_\_

**Date of tube removal\*†§** |\_\_|\_\_| - |\_\_|\_\_| - |\_\_|\_\_| (dd-mm-yy)

\*Unknown: 99-99-99

†All reasons for tube removal

§Patients are normally discharged with tube in situ. Date may be later than date of discharge

**If the tube was removed, was it replaced**

- No       Yes       Unknown

|  
**Date of tube replacement\*†** |\_\_|\_\_| - |\_\_|\_\_| - |\_\_|\_\_|  
(dd-mm-yy)

\*Unknown: 99-99-99

†Tube replacement directly following tube removal (within 48 hours), not tube placement during readmission

**Date of replaced tube removal\*†§** |\_\_|\_\_| - |\_\_|\_\_| - |\_\_|\_\_|  
(dd-mm-yy)

\*Unknown: 99-99-99

†All reasons for tube removal

§Patients are normally discharged with tube in situ. Date may be later than date of discharge.

**Was a duodenal or jejunal tube placed at any point\***

- No       Yes       Unknown

- |  
 At initial tube placement (instead of nasogastric tube)  
 At replacement

\*In general a nasogastric tube is placed

**Reason(s) for duodenal or jejunal tube placement**

- Nasogastric tube dislocation  
 Continuation of vomiting  
 Other; \_\_\_\_\_

Verwijderd: 1

Verwijderd: 17

Verwijderd: 04

Case Number |\_|\_|\_| - |\_|\_|\_|

## 7. Level of care

Did patient return/go to primary care after remission (or stabilization) of HG during the course of pregnancy

No  Yes  Unknown

|  
**Date of return to primary care\*** |\_|\_| - |\_|\_| - |\_|\_| (dd-mm-yy)  
*\*Unknown: 99-99-99*

Was patient afterwards referred to secondary/tertiary care

No  Yes  Unknown

|  
**Date of referral\*** |\_|\_| - |\_|\_| - |\_|\_| (dd-mm-yy)  
*\*Unknown: 99-99-99*

Was there a medical indication(s) for (continuation of) antenatal/perinatal care after 20 weeks gestation in a secondary/tertiary center

No\*  Yes  Unknown

- |
- Continuation of HG
  - PIH
  - PE/HELLP
  - IUGR
  - Diabetes (gravidarum/type I/type II)
  - Premature rupture of membranes
  - Threatening preterm labour
  - Placenta previa (marginalis/totalis)
  - Vaginal bleeding 2<sup>nd</sup>/3<sup>th</sup> trimester
  - Placental abruption (partial/total)
  - Breech/transverse position
  - Other

\* No secondary/tertiary care, or patients wish for secondary/tertiary care without medical indication

Verwijderd: 1

Verwijderd: 17

Verwijderd: 04

Case Number |\_|\_|\_| - |\_|\_|\_|

### 7.1 Routine pregnancy check-ups

Was maternal weight measured during routine pregnancy check-ups  
(primary/secondary/tertiary care)

No       Yes       Unknown

| Measurement | Weight *<br>kg (35-250)<br>*Unknown: -1 | Date of measurement*<br>(dd-mm-yy)<br>*Unknown: -1 |
|-------------|-----------------------------------------|----------------------------------------------------|
| 1           | _ _ _                                   | _ _ - _ _ - _ _                                    |
| 2           | _ _ _                                   | _ _ - _ _ - _ _                                    |
| 3           | _ _ _                                   | _ _ - _ _ - _ _                                    |
| 4           | _ _ _                                   | _ _ - _ _ - _ _                                    |
| 5           | _ _ _                                   | _ _ - _ _ - _ _                                    |
| 6           | _ _ _                                   | _ _ - _ _ - _ _                                    |
| 7           | _ _ _                                   | _ _ - _ _ - _ _                                    |
| 8           | _ _ _                                   | _ _ - _ _ - _ _                                    |

### 7.2 Hospital readmissions for HG

Number of readmissions for HG\*      |\_|\_| (0-10)

*\*After admission in which patient was randomized*

Fill out dates of readmission(s) because of HG

| Readmission* | Hospital admission<br>(dd-mm-yy) | Discharge home<br>(dd-mm-yy) |
|--------------|----------------------------------|------------------------------|
| 1            | _ _ - _ _ - _ _                  | _ _ - _ _ - _ _              |
| 2            | _ _ - _ _ - _ _                  | _ _ - _ _ - _ _              |
| 3            | _ _ - _ _ - _ _                  | _ _ - _ _ - _ _              |
| 4            | _ _ - _ _ - _ _                  | _ _ - _ _ - _ _              |
| 5            | _ _ - _ _ - _ _                  | _ _ - _ _ - _ _              |

*\*If more than 5 readmissions, please print/copy this page another time to fill out dates of subsequent readmissions*

Verwijderd: 1

Verwijderd: 17

Verwijderd: 04

Case Number |\_\_|\_\_|\_\_| - |\_\_|\_\_|\_\_|

**Fill out details on each readmission because of HG\***

\*If more than 1 readmission, please print/copy this page another time to fill out details on subsequent readmission(s)

|                                                                                                                                        |                                                                                                                                                                                                             |                                                                                                                                                                                                                                                                                                                                                                                                                                                          |                               |
|----------------------------------------------------------------------------------------------------------------------------------------|-------------------------------------------------------------------------------------------------------------------------------------------------------------------------------------------------------------|----------------------------------------------------------------------------------------------------------------------------------------------------------------------------------------------------------------------------------------------------------------------------------------------------------------------------------------------------------------------------------------------------------------------------------------------------------|-------------------------------|
| <b>Readmission No</b>  __ __  (0-10)                                                                                                   |                                                                                                                                                                                                             |                                                                                                                                                                                                                                                                                                                                                                                                                                                          |                               |
| <b>Weight at readmission**†</b>  __ __ __  kg (35-250)<br><small>*Unknown: -1<br/>†First measured weight at/during readmission</small> |                                                                                                                                                                                                             |                                                                                                                                                                                                                                                                                                                                                                                                                                                          |                               |
| <b>Urinary ketones*</b><br><small>*First measurement on day of readmission or during readmission</small>                               | <input type="radio"/> Negative                                                                                                                                                                              | <input type="radio"/> Positive<br> <br><input type="radio"/> +<br><input type="radio"/> ++<br><input type="radio"/> +++<br><input type="radio"/> ++++<br><input type="radio"/> Unknown                                                                                                                                                                                                                                                                   | <input type="radio"/> Unknown |
| <b>Intravenous drip</b>                                                                                                                | <input type="radio"/> No                                                                                                                                                                                    | <input type="radio"/> Yes<br> <br><b>i.v. drip solution contained*</b><br><input type="checkbox"/> NaCl<br><input type="checkbox"/> Glucose<br><input type="checkbox"/> KCl<br><input type="checkbox"/> Other; _____<br><small>*If in medical or nursing record only: 'i.v. drip according to protocol', fill out what is prescribed according to local protocol for HG</small>                                                                          | <input type="radio"/> Unknown |
| <b>Was i.v. drip placed on day of readmission</b>                                                                                      | <input type="radio"/> No                                                                                                                                                                                    | <input type="radio"/> Yes                                                                                                                                                                                                                                                                                                                                                                                                                                | <input type="radio"/> Unknown |
|                                                                                                                                        | <br><b>Date of placement*</b>  __ __  -  __ __  -  __ __  (dd-mm-yy)<br><small>*Unknown: 99-99-99</small>                                                                                                   |                                                                                                                                                                                                                                                                                                                                                                                                                                                          |                               |
| <b>Was i.v. drip removed on day of discharge</b>                                                                                       | <input type="radio"/> No                                                                                                                                                                                    | <input type="radio"/> Yes                                                                                                                                                                                                                                                                                                                                                                                                                                | <input type="radio"/> Unknown |
|                                                                                                                                        | <br><b>Date of removal*</b>  __ __  -  __ __  -  __ __  (dd-mm-yy)<br><small>*Unknown: 99-99-99</small>                                                                                                     |                                                                                                                                                                                                                                                                                                                                                                                                                                                          |                               |
| <b>Tube feeding</b>                                                                                                                    | <input type="radio"/> No                                                                                                                                                                                    | <input type="radio"/> Yes                                                                                                                                                                                                                                                                                                                                                                                                                                | <input type="radio"/> Unknown |
| <b>Was tube placed on day of readmission</b>                                                                                           | <input type="radio"/> No                                                                                                                                                                                    | <input type="radio"/> Yes                                                                                                                                                                                                                                                                                                                                                                                                                                | <input type="radio"/> Unknown |
|                                                                                                                                        | <br><b>Date of placement*</b>  __ __  -  __ __  -  __ __  (dd-mm-yy)<br><small>*Unknown: 99-99-99</small>                                                                                                   |                                                                                                                                                                                                                                                                                                                                                                                                                                                          |                               |
| <b>Was tube removed on day of discharge</b>                                                                                            | <input type="radio"/> No                                                                                                                                                                                    | <input type="radio"/> Yes                                                                                                                                                                                                                                                                                                                                                                                                                                | <input type="radio"/> Unknown |
|                                                                                                                                        | <br><b>Date of removal**†</b>  __ __  -  __ __  -  __ __  (dd-mm-yy)<br><small>*Unknown: 99-99-99<br/>†Patients are normally discharged with tube in situ. Date may be later than date of discharge</small> |                                                                                                                                                                                                                                                                                                                                                                                                                                                          |                               |
| <b>Antiemetics</b>                                                                                                                     | <input type="radio"/> No                                                                                                                                                                                    | <input type="radio"/> Yes<br> <br><input type="checkbox"/> Emesafene p.o. / supp<br><input type="checkbox"/> Primperan p.o. / supp<br><input type="checkbox"/> Primperan i.v.<br><input type="checkbox"/> Ondansetron (Zofran) p.o. / supp<br><input type="checkbox"/> Ondansetron (Zofran) i.v.<br><input type="checkbox"/> Steroids*<br><input type="checkbox"/> Other<br><small>*Prescribed as antiemetic, not because of fetal lung ripening</small> | <input type="radio"/> Unknown |
| <b>Vitamins</b>                                                                                                                        | <input type="radio"/> No                                                                                                                                                                                    | <input type="radio"/> Yes<br> <br><input type="checkbox"/> B1 (thiamin)<br><input type="checkbox"/> B6 (pyridoxin)<br><input type="checkbox"/> B12 (cobalamin)<br><input type="checkbox"/> B complex<br><input type="checkbox"/> Other                                                                                                                                                                                                                   | <input type="radio"/> Unknown |

Verwijderd: 1  
Verwijderd: 17  
Verwijderd: 04

Case Number |\_|\_|\_| - |\_|\_|\_|

## 8. Delivery

### Onset of labour

- Spontaneously
- Primary caesarean section
- Induction

### Induction of labour or primary caesarean section

- No
  - Yes
  - Unknown
- |
- Maternal indication\*
  - Fetal indication†
  - Elective§

\*Such as hypertension

†Such as growth restriction or breech position

§Non-medical reason such as patients wish or 'DDD' (discrepantie draagkracht draaglast)

### Place of birth

- Home delivery, primary care
- Hospital delivery, primary care
- Hospital delivery, secondary/tertiary care

### Analgesics during labour\*

- No
- Yes
- Unknown

\*Not during surgical intervention, e.g. caesarean section

### Route of delivery

- vaginally
- caesarean section

### Delivery of placenta

- Spontaneously
- Manual removal
- Manual removal during caesarean section

### Placental weight measured

- No
- Yes
- Unknown

|

**Placental weight\*** |\_|\_|\_|\_| grams (100-2000)

\*Unknown: -1

Verwijderd: 1

Verwijderd: 17

Verwijderd: 04



Case Number |\_|\_|\_| - |\_|\_|\_|

Total haemorrhage |\_|\_|\_|\_| ml (50-9999)

Maternal death\*†

No

Yes

|  
Date of death |\_|\_| - |\_|\_| - |\_|\_| (dd-mm-yy)

\*Within 6 weeks of delivery

†Fill out SAE form

Verwijderd: 1

Verwijderd: 17

Verwijderd: 04

Case Number |\_|\_|\_| - |\_|\_|\_|

9. Neonatal birth data

Multiple pregnancy

No  Yes

|  
Child no. \* |\_| (0-3)

*\*If multiple, please print/copy this page another time to fill out details for subsequent child(ren)*

Date of birth |\_|\_| - |\_|\_| - |\_|\_| (dd-mm-yy)

Live birth

Yes  
 No, deceased during delivery < 24 hours postpartum\*  
 No, deceased before delivery\*

|  
Estimated date of death |\_|\_| - |\_|\_| - |\_|\_| (dd-mm-yy)

*\*Fill out SAE form*

Apgar score (5 min) |\_|\_| (00-10)

Umbilical cord pH's measured

No  Yes  Unknown

|  
Arterial pH |\_|.|\_|\_| (6.00-7.70)  
Venous pH |\_|.|\_|\_| (6.00-7.70)

Sex

Boy  
 Girl

Birth weight |\_|\_|\_|\_| grams (300-6500)

Neonatal death ≥ 24 hours postpartum

No  Yes\*  Unknown

|  
Date of death |\_|\_| - |\_|\_| - |\_|\_| (dd-mm-yy)

*\*Fill out SAE form*

Verwijderd: 1

Verwijderd: 17

Verwijderd: 04

Case Number |\_|\_|\_| - |\_|\_|\_|

## 10. Hospital admission postpartum

### 10.1 Maternal hospital admission

#### Maternal hospital admission < 12 hours postpartum

No       Yes\*       Unknown

|

- Maternal indication
- Neonatal indication

*\*Fill out SAE form*

#### If hospital admission on maternal indication: indication(s) for admission

- Suspected infection
- Tromboembolic complication
- Hypertensive disorder
- Postpartum haemorrhage
- Post-caesarean
- Eclampsia/HELLP
- Other

#### Date of hospital admission equal to date of delivery

No       Yes       Unknown

|

Date of hospital admission |\_|\_| - |\_|\_| - |\_|\_| (dd-mm-yy)

Date of discharge home |\_|\_| - |\_|\_| - |\_|\_| (dd-mm-yy)

Verwijderd: 1

Verwijderd: 17

Verwijderd: 04

Case Number |\_\_|\_\_|\_\_| - |\_\_|\_\_|\_\_|

## 10.2 Neonatal hospital admission

### Multiple pregnancy

No  Yes

|  
Child no. \* |\_\_| (0-3)

*\*If multiple, please print/copy this page another time to fill out details for subsequent child(ren)*

### Neonatal hospital admission <6 weeks postpartum

No  Yes\*  Unknown

|  
 Maternal indication  
 Neonatal indication

*\*Fill out SAE form*

### If hospital admission on neonatal indication: indication(s) for admission\*

- Small for gestational age (defined as birth weight < P10)
- Large for gestational age (defined as birth weight >P 90)
- Congenital anomaly or suspicion for abnormality
- Hypoglycaemia (i.v. treatment needed)
- Hyperbilirubinemia (phototherapy or transfusion needed)
- Infection/ Sepsis (suspected or proven positive culture)
- Convulsions
- Other

*\*As reported in the final discharge letter of pediatrician*

### Date of hospital admission equal to date of birth

No  Yes  Unknown

|  
Date of hospital admission |\_\_|\_\_| - |\_\_|\_\_| - |\_\_|\_\_| (dd-mm-yy)

Date of discharge home |\_\_|\_\_| - |\_\_|\_\_| - |\_\_|\_\_| (dd-mm-yy)

**Note: please attach an anonymized copy of the final pediatric discharge letter; mark this letter with maternal case number on every page**

Verwijderd: 1

Verwijderd: 17

Verwijderd: 04

### 11. (Serious) Adverse Events

In this pregnancy, has there been an adverse event(s) (AE)\*

No       Yes       Unknown

|  
Please specify; \_\_\_\_\_

*\*Any undesirable event during the course of the study whether or not considered related to the intervention, spontaneously reported by patient, or observed by caregiver/research staff, but not leading to hospital admission (see SAE). Examples of AE's are: broken leg, fall from stairs, brain contusion etc.*

In this pregnancy, has there been a Serious Adverse Event(s) (SAE)\*

No       Yes       Unknown

- |
- Miscarriage
  - Hospital admission(s) after initial admission at study entry<sup>†</sup>
  - Significant prolongation of hospital admission
  - Maternal (pregnancy) complications<sup>§</sup>
  - Complications due to tube placement  
(e.g. aspiration/intestinal bleeding/intestinal perforation)
  - Maternal death
  - Neonatal hospital admission<sup>‡</sup>
  - Birth defect/congenital anomaly neonate
  - Perinatal death
  - Other; \_\_\_\_\_

*\*Any of the above mentioned situations, or AE causing significant disability to the patient, or AE requiring interventions to prevent a SAE from happening.*

*<sup>†</sup>Any reason, excluding hospital admissions for HG (these are already reported in CRF)*

*<sup>§</sup>Think of ICU admission (e.g. due to massive postpartum haemorrhage), uterine rupture, placental abruption etc.*

*<sup>‡</sup>Any reason*

**Note: in all cases of SAE fill out SAE form (see study website → documents)**

Verwijderd: 1

Verwijderd: 17

Verwijderd: 04

Case Number |\_|\_|\_| - |\_|\_|\_|

## 12. End Study Form

I have filled out this form accurately and truthfully

Name: \_\_\_\_\_

Date: |\_|\_| - |\_|\_| - |\_|\_| (dd-mm-yy)

Signature: \_\_\_\_\_

### 12.1 Study stop

Has patient reached the endpoint of the study (childbirth)

No       Yes       Lost to follow up

Has patient (partially) withdrawn from study

- No       Yes
- Withdrawn from biobank
  - Withdrawn from filling out diaries
  - Completely withdrawn from study participation\*

*\*Patient has explicitly expressed wish that patient information may no longer be used for this study*

Reason for (partial) study withdrawal

- Unknown
- Adverse event
- Other: \_\_\_\_\_

-----  
**END OF Case Report Form**  
**THANK YOU FOR FILLING OUT THIS FORM**  
-----

Verwijderd: 1

Verwijderd: 17

Verwijderd: 04

### 13. Supplement for patients included before 01-10-2014

**Note: Is the patient included before 01-10-2014? Please try to answer the following questions.**  
**For patients included from 01-10-2014 onwards, the following questions have been asked in questionnaire A (at inclusion) and filling out this supplement is not necessary**

#### 13.1 Maternal background

##### **Ethnicity**

- Unknown
- Dutch
- European / North American / Oceanian
- South American
- Turkish
- Surinamese
- Antillean / Aruban / Cape Verdian
- African (Sub-Sahara)
- Indonesian / Moluccan / Japanese
- Indian / Pakistani
- Other; \_\_\_\_\_

##### **Highest finished education**

- Unknown
- Primary school
- Secondary school
- Lower professional school (VMBO)
- Medium professional school (MBO)
- Higher professional school (HBO)
- University (WO)
- Other; \_\_\_\_\_

##### **Relationship**

- Unknown
- Single
- Living together with partner

Verwijderd: 1

Verwijderd: 17

Verwijderd: 04

Case Number |\_|\_|\_| - |\_|\_|\_|

### 13.2 Current pregnancy

#### Mode of conception

- Unknown
- Spontaneous (natural route)
- IUI (intrauterine insemination)
- Ovulation-induction (medication to effectuate menstrual cycle)
- IVF (in vitro fertilization)
- ICSI (intracytoplasmic sperm injection)
- Other; \_\_\_\_\_

Nausea reported since gestational age |\_|\_| weeks (0-20)

Vomiting reported since gestational age |\_|\_| weeks (0-20)

Verwijderd: 1

Verwijderd: 17

Verwijderd: 04
